# Supplementary material for: Factors affecting the implementation of childhood vaccination communication strategies in Nigeria: a qualitative study
Source: Springer Nature journal article supplement (doi:10.1186/s12889-017-4020-6), 2017-02-15
Supplement: MOESM2 [file 12069212]

Additional file 2: SURE Framework of key domains for the identification of factors affecting the implementation of policy options (adapted from the SURE Framework\*)

| <b>Level</b>                                                                                                                                                                   | <b>Factors affecting implementation</b>                                      |
|--------------------------------------------------------------------------------------------------------------------------------------------------------------------------------|------------------------------------------------------------------------------|
| <b>Recipients of care</b>                                                                                                                                                      | Knowledge and skills                                                         |
|                                                                                                                                                                                | Attitudes regarding programme acceptability, appropriateness and credibility |
|                                                                                                                                                                                | Motivation to change or adopt new behaviour                                  |
| <b>Providers of care</b>                                                                                                                                                       | Knowledge and skills                                                         |
|                                                                                                                                                                                | Attitudes regarding programme acceptability, appropriateness and credibility |
|                                                                                                                                                                                | Motivation to change or adopt new behaviour                                  |
| <b>Other stakeholders (including other healthcare providers, community health committees, community leaders, programme managers, donors, policymakers and opinion leaders)</b> | Knowledge and skills                                                         |
|                                                                                                                                                                                | Attitudes regarding programme acceptability, appropriateness and credibility |
|                                                                                                                                                                                | Motivation to change or adopt new behaviour                                  |
| <b>Health system constraints</b>                                                                                                                                               | Accessibility of care                                                        |
|                                                                                                                                                                                | Financial resources                                                          |
|                                                                                                                                                                                | Human resources                                                              |
|                                                                                                                                                                                | Educational and training system, including recruitment and selection         |
|                                                                                                                                                                                | Clinical supervision, support structures and guidelines                      |
|                                                                                                                                                                                | Internal communication                                                       |
|                                                                                                                                                                                | External communication                                                       |
|                                                                                                                                                                                | Allocation of authority                                                      |
|                                                                                                                                                                                | Accountability                                                               |
|                                                                                                                                                                                | Community participation                                                      |
|                                                                                                                                                                                | Management and/or leadership                                                 |
|                                                                                                                                                                                | Information systems                                                          |
|                                                                                                                                                                                | Scale of private sector care                                                 |
|                                                                                                                                                                                | Facilities                                                                   |
|                                                                                                                                                                                | Patient flow processes                                                       |
|                                                                                                                                                                                | Procurement and distribution systems                                         |
| Incentives                                                                                                                                                                     |                                                                              |
| Bureaucracy                                                                                                                                                                    |                                                                              |
| Relationship with norms and standards                                                                                                                                          |                                                                              |
| <b>Social and political constraints</b>                                                                                                                                        | Ideology                                                                     |
|                                                                                                                                                                                | Governance                                                                   |
|                                                                                                                                                                                | Short-term thinking                                                          |
|                                                                                                                                                                                | Contracts                                                                    |
|                                                                                                                                                                                | Legislation or regulation                                                    |
|                                                                                                                                                                                | Donor policies                                                               |
|                                                                                                                                                                                | Influential people                                                           |
|                                                                                                                                                                                | Corruption                                                                   |
| Political stability and commitment                                                                                                                                             |                                                                              |

\* The SURE Collaboration: Guides for Preparing and Using Evidence- Based Policybriefs: identifying and addressing barriers to implementing policy options. Version 2.1. 2011.
